# Supplementary material
Source: MDPI journal article supplement (https://www.mdpi.com/2673-4672/4/1/4)
Supplement: s1 [file s1]

## Supplementary Material

Table S1: Discharge characteristics of the wastewater treatment plant (WWTP) Bempflingen-Riederich (3-stage-WWTP) in the year 2020. WWTP-out = WWTP effluent, COD = chemical oxygen demand

| Monthly average | WWTP-out COD in mg/l | COD efficiency in % | WWTP-out NH <sub>4</sub> -N in mg/l | WWTP-out N <sub>anorg</sub> in mg/l | WWTP-out P <sub>total</sub> in mg/l |
|-----------------|----------------------|---------------------|-------------------------------------|-------------------------------------|-------------------------------------|
| January         | 15,8                 | 97,8                | 0,94                                | 8,11                                | 0,45                                |
| February        | 16,1                 | 88,8                | 0,07                                | 8,57                                | 0,31                                |
| March           | 15,3                 | 97,2                | 0,26                                | 4,87                                | 0,36                                |
| April           | 20,3                 | 95,4                | 1,16                                | 7,16                                | 0,24                                |
| May             | 16,3                 | 94,3                | 0,25                                | 7,59                                | 0,18                                |
| June            | 18,6                 | 94,7                | 0,1                                 | 6,58                                | 0,15                                |
| July            | 13,2                 | 92,4                | 0,06                                | 5,73                                | 0,26                                |
| August          | 12,8                 | 95,0                | 0,06                                | 6,14                                | 0,63                                |
| September       | 15,1                 | 96,1                | 0,03                                | 10,45                               | 0,53                                |
| October         | 13,9                 | 97,1                | 0,17                                | 8,05                                | 0,54                                |
| November        | 15,9                 | 98,2                | 0,12                                | 9,26                                | 0,33                                |
| December        | 16,1                 | 98,2                | 0,44                                | 6,95                                | 0,26                                |
| Annual average  | 15,8                 | 95,4                | 0,30                                | 7,50                                | 0,40                                |

Table S2: Discharge characteristics of the wastewater treatment plant (WWTP) Albstadt-Lautlingen (4-stage-WWTP) in the year 2020. WWTP-out = WWTP effluent, COD = chemical oxygen demand

| Monthly average | WWTP-out COD in mg/l | COD efficiency in % | WWTP-out NH <sub>4</sub> -N in mg/l | WWTP-out N <sub>anorg</sub> in mg/l | WWTP-out PO <sub>4</sub> -P in mg/l |
|-----------------|----------------------|---------------------|-------------------------------------|-------------------------------------|-------------------------------------|
| January         | 6                    | 96,5                | 0,08                                | 7,36                                | 0,07                                |
| February        | 5                    | 94,2                | 0,03                                | 4,62                                | 0,03                                |
| March           | 5                    | 95,8                | 0,02                                | 5,62                                | 0,03                                |
| April           | 5                    | 98,4                | 0,01                                | 8,60                                | 0,05                                |
| May             | 7                    | 97,6                | 0,03                                | 6,49                                | 0,04                                |
| June            | 6                    | 95,1                | 0,02                                | 5,12                                | 0,05                                |
| July            | 6                    | 97,8                | 0,01                                | 8,59                                | 0,05                                |
| August          | 6                    | 97,2                | 0,01                                | 5,04                                | 0,04                                |
| September       | 4                    | 98,7                | 0,01                                | 7,38                                | 0,09                                |
| October         | 7                    | 97,0                | 0,01                                | 3,89                                | 0,07                                |
| November        | 6                    | 97,9                | 0,02                                | 7,46                                | 0,03                                |
| December        | 6                    | 96,5                | 0,08                                | 5,75                                | 0,03                                |
| Annual average  | 6                    | 97,3                | 0,03                                | 6,32                                | 0,05                                |

Table S3: Limnological parameters measured during gammarid sampling in July (sampling of precopula pairs) and August (sampling of gammarids in the non-reproductive phase) 2020, up- and downstream of the 3-stage-WWTP as well as up- and downstream of the 4-stage-WWTP. July 2020 = 13.07.2020; August 2020 = 04.08.2020. Values that represent a very good ecological status according to the “Oberflächengewässerverordnung” (OGewV. Verordnung zum Schutz der Oberflächengewässer (Oberflächengewässerverordnung - OGewV) 2016) are marked with a green colour. Values indicating good ecological status are shown in yellow. If no good ecological status can be achieved, the value is marked in orange. Values that are not marked are not used to classify ecological status. Nitrate values are assessed using the AA\_EQS. Values exceeding the AA-EQS are marked in red. Values below the AA-EQS are marked green.

|                           | July 2020             |                         |                       |                         | August 2020           |                         |                       |                         |
|---------------------------|-----------------------|-------------------------|-----------------------|-------------------------|-----------------------|-------------------------|-----------------------|-------------------------|
|                           | 3-stage-WWTP upstream | 3-stage-WWTP downstream | 4-stage-WWTP upstream | 4-stage-WWTP downstream | 3-stage-WWTP upstream | 3-stage-WWTP downstream | 4-stage-WWTP upstream | 4-stage-WWTP downstream |
| Oxygen in mg/l            | 9,87                  | 9,56                    | 10,02                 | 9,12                    | 9,27                  | 9,00                    | 9,49                  | 9,06                    |
| Oxygen in %               | 99,0                  | 97,3                    | 108,6                 | 100,2                   | 97,9                  | 94,7                    | 103,4                 | 100,2                   |
| Water temperature         | 14,3                  | 15,0                    | 15,7                  | 16,4                    | 16,1                  | 16,2                    | 15,4                  | 15,4                    |
| Conductivity in µS/cm     | 657                   | 654                     | 486                   | 671                     | 350                   | 345                     | 503                   | 457                     |
| pH                        |                       | 8,26                    | 83,42                 | 8,03                    | 8,02                  | 8,02                    | 8,22                  | 7,9                     |
| NH4-N in mg/l             | 0,04                  | 0,04                    | <0,04                 | <0,04                   | 0,1                   | 0,1                     | <0,04                 | <0,04                   |
| PO4-P in mg/l             | <0,05                 | <0,05                   | <0,05                 | <0,05                   | 0,09                  | 0,1                     | <0,05                 | <0,05                   |
| Chloride in mg/l          | 41                    | 45                      | 36                    | 71                      | 19                    | 20                      | 36                    | 38                      |
| NO2-N in mg/l             | 0,017                 | 0,013                   | <0,003                | <0,003                  | 0,024                 | 0,027                   | 0,003                 | <0,003                  |
| NO3-N in mg/l             | 3,4                   | 3,7                     | 0,3                   | 4,8                     | 1,8                   | 1,8                     | 0,5                   | 1,6                     |
| Carbonate hardness in °dH | 17                    | 14                      | 14                    | 14                      | 9                     | 9                       | 12                    | 6                       |
| Total hardness in °dH     | 21                    | 21                      | 18                    | 19                      | 12                    | 10                      | 15                    | 10                      |

Table S4: Limnological parameters at the end of exposure of gammarids, separated from precopula pairs up- and downstream of the 3-stage-WWTP as well as up- and downstream of the 4-stage-WWTP, at 15 °C and 25 °C. Exposure duration: 13.07.-20.07.2020. F = female aquaria, M = male aquaria. Values that represent a very good ecological status according to the “Oberflächengewässerverordnung” (OGewV. Verordnung zum Schutz der Oberflächengewässer (Oberflächengewässerverordnung - OGewV) 2016) are marked with a green colour. Values indicating good ecological status are shown in yellow. If no good ecological status can be achieved, the value is marked in orange. Values that are not marked are not used to classify ecological status. Nitrate values are assessed using the AA\_EQS. Values exceeding the AA-EQS are marked in red. Values below the AA-EQS are marked green.

|                           | 15 °C                 |       |                         |       |                       |       |                         |       | 25 °C                 |       |                         |       |                       |       |                         |        |
|---------------------------|-----------------------|-------|-------------------------|-------|-----------------------|-------|-------------------------|-------|-----------------------|-------|-------------------------|-------|-----------------------|-------|-------------------------|--------|
|                           | 3-stage-WWTP upstream |       | 3-stage-WWTP downstream |       | 4-stage-WWTP upstream |       | 4-stage-WWTP downstream |       | 3-stage-WWTP upstream |       | 3-stage-WWTP downstream |       | 4-stage-WWTP upstream |       | 4-stage-WWTP downstream |        |
|                           | F                     | M     | F                       | M     | F                     | M     | F                       | M     | F                     | M     | F                       | M     | F                     | M     | F                       | M      |
| Oxygen in mg/l            | 9,62                  | 9,13  | 9,64                    | 9,03  | 9,3                   | 9,46  | 9,48                    | 9,57  | 7,99                  | 7,85  | 8,04                    | 8,01  | 7,93                  | 7,97  | 7,96                    | 7,94   |
| Oxygen in %               | 101,9                 | 89,8  | 102,2                   | 98,1  | 100,3                 | 101,1 | 101,4                   | 101   | 101                   | 99,7  | 101,2                   | 101,7 | 100,7                 | 100,5 | 100,7                   | 101,1  |
| Water temperature         | 15,6                  | 16,6  | 15,7                    | 16,8  | 16,4                  | 16,0  | 16,0                    | 15,5  | 24,4                  | 24,7  | 24,2                    | 24,7  | 24,7                  | 24,3  | 24,5                    | 24,8   |
| Conductivity in µS/cm     | 619                   | 501   | 650                     | 639   | 427                   | 399   | 527                     | 538   | 447                   | 466   | 459                     | 441   | 395                   | 408   | 557                     | 562    |
| pH                        | 8,11                  | 6,73  | 8,17                    | 8,06  | 8,31                  | 8,14  | 7,85                    | 8,06  | 7,21                  | 7,5   | 7,25                    | 7,22  | 7,77                  | 7,93  | 7,67                    | 7,8    |
| NH4-N in mg/l             | 0,08                  | 0,06  | 0,07                    | 0,07  | 0,29                  | 0,18  | 0,35                    | 0,07  | <0,04                 | 0,91  | 0,04                    | 0,89  | 0,36                  | 2,12  | 1                       | 0,36   |
| PO4-P in mg/l             | <0,05                 | <0,05 | <0,05                   | <0,05 | <0,05                 | <0,05 | <0,05                   | <0,05 | <0,05                 | <0,05 | <0,05                   | <0,05 | 0,06                  | <0,05 | <0,05                   | <0,05  |
| Chloride in mg/l          | 43                    | 44    | 45                      | 47    | 38                    | 38    | 75                      | 75    | 43                    | 44    | 36                      | 46    | 38                    | 38    | 72                      | 74     |
| NO2-N in mg/l             | 0,029                 | 0,011 | 0,01                    | 0,008 | 0,011                 | 0,009 | 0,033                   | 0,008 | 0,083                 | 0,144 | 0,088                   | 0,099 | 0,055                 | 0,054 | >0,460                  | >0,460 |
| NO3-N in mg/l             | 3,8                   | 3,4   | 3,5                     | 3     | 0,7                   | 0,6   | 5,1                     | 5     | 3,1                   | 2,9   | 3,2                     | 3,4   | 0,5                   | 0,3   | 2                       | 2      |
| Carbonate hardness in °dH | 14                    | 9     | 17                      | 14    | 10                    | 9     | 7                       | 8     | 7                     | 7     | 7                       | 6     | 8                     | 9     | 9                       | 8      |
| Total hardness in °dH     | 20                    | 12    | 20                      | 21    | 13                    | 12    | 14                      | 12    | 10                    | 11    | 11                      | 10    | 11                    | 11    | 12                      | 11     |

Table S5: Limnological parameters at the end of exposure of gammarids in the non-reproductive phase, sampled up- and downstream of the 3-stage-WWTP as well as up- and downstream of the 4-stage-WWTP, at 18 °C and 25 °C. Exposure duration: 04.08.-11.08.2020.

|                           | 18 °C                 |                         |                       |                         | 25 °C                 |                         |                       |                         |
|---------------------------|-----------------------|-------------------------|-----------------------|-------------------------|-----------------------|-------------------------|-----------------------|-------------------------|
|                           | 3-stage-WWTP upstream | 3-stage-WWTP downstream | 4-stage-WWTP upstream | 4-stage-WWTP downstream | 3-stage-WWTP upstream | 3-stage-WWTP downstream | 4-stage-WWTP upstream | 4-stage-WWTP downstream |
| Oxygen in mg/l            | 8,68                  | 8,7                     | 8,84                  | 8,88                    | 7,82                  | 7,91                    | 7,92                  | 7,93                    |
| Oxygen in %               | 99,4                  | 98,5                    | 99,9                  | 100,5                   | 101                   | 101,2                   | 101,3                 | 101,5                   |
| Water temperature         | 18,8                  | 18,4                    | 18,7                  | 18,7                    | 25,6                  | 25                      | 25,0                  | 25,1                    |
| Conductivity in µS/cm     | 361                   | 347                     | 370                   | 389                     | 360                   | 359                     | 390                   | 399                     |
| pH                        | 8,29                  | 8,18                    | 8,26                  | 8,19                    | 8,3                   | 8,05                    | 8,16                  | 8,13                    |
| NH4-N in mg/l             | 0,09                  | <0,04                   | 0,15                  | 0,25                    | 0,1                   | 0,27                    | 0,37                  | 0,13                    |
| PO4-P in mg/l             | <0,05                 | <0,05                   | <0,05                 | <0,05                   | <0,05                 | <0,05                   | <0,05                 | <0,05                   |
| Chloride in mg/l          | 21                    | 21                      | 38                    | 41                      | 23                    | 25                      | 40                    | 41                      |
| NO2-N in mg/l             | 0,029                 | 0,006                   | 0,008                 | 0,01                    | 0,11                  | 0,018                   | 0,017                 | 0,01                    |
| NO3-N in mg/l             | 1,5                   | 1,4                     | 0,5                   | 1,5                     | 1,5                   | 1,4                     | 0,5                   | 1,5                     |
| Carbonate hardness in °dH | 9                     | 8                       | 7                     | 7                       | 9                     | 9                       | 9                     | 8                       |
| Total hardness in °dH     | 10                    | 9                       | 9                     | 9                       | 10                    | 11                      | 11                    | 11                      |

Table S6: Exposure of male and female gammarids separated from precopula pairs, sampled up- and downstream of the 3-stage-WWTP as well as up- and downstream of the 4-stage-WWTP. Numbers of individuals at the beginning of exposure (13.07.2020 “# alive start exposure”) and at the end of exposure (20.07.2023 “# alive end”, “# dead end”).

| Temperature | Sampling site                      | Sex    | # alive start exposure | # alive end | # dead end |
|-------------|------------------------------------|--------|------------------------|-------------|------------|
| 15 °C       | 3-stage-WWTP <sub>upstream</sub>   | Female | 50                     | 41          | 9          |
| 15 °C       | 3-stage-WWTP <sub>upstream</sub>   | Male   | 50                     | 46          | 4          |
| 15 °C       | 3-stage-WWTP <sub>downstream</sub> | Female | 50                     | 44          | 6          |
| 15 °C       | 3-stage-WWTP <sub>downstream</sub> | Male   | 50                     | 47          | 3          |
| 15 °C       | 4-stage-WWTP <sub>upstream</sub>   | Female | 50                     | 36          | 14         |
| 15 °C       | 4-stage-WWTP <sub>upstream</sub>   | Male   | 50                     | 42          | 8          |
| 15 °C       | 4-stage-WWTP <sub>downstream</sub> | Female | 50                     | 31          | 19         |
| 15 °C       | 4-stage-WWTP <sub>downstream</sub> | Male   | 50                     | 45          | 5          |
| 25 °C       | 3-stage-WWTP <sub>upstream</sub>   | Female | 50                     | 4           | 46         |
| 25 °C       | 3-stage-WWTP <sub>upstream</sub>   | Male   | 50                     | 11          | 39         |
| 25 °C       | 3-stage-WWTP <sub>downstream</sub> | Female | 50                     | 6           | 44         |
| 25 °C       | 3-stage-WWTP <sub>downstream</sub> | Male   | 50                     | 9           | 41         |
| 25 °C       | 4-stage-WWTP <sub>upstream</sub>   | Female | 50                     | 0           | 50         |
| 25 °C       | 4-stage-WWTP <sub>upstream</sub>   | Male   | 50                     | 0           | 50         |
| 25 °C       | 4-stage-WWTP <sub>downstream</sub> | Female | 50                     | 0           | 50         |
| 25 °C       | 4-stage-WWTP <sub>downstream</sub> | Male   | 50                     | 0           | 50         |

Table S7: Exposure of gammarids in the non-reproductive phase, sampled up- and downstream of the 3-stage-WWTP as well as up- and downstream of the 4-stage-WWTP. Numbers of individuals at the beginning of exposure (04.08.2020 “# alive start exposure”) and at the end of exposure (11.08.2023 “# alive end”, “# dead end”).

| Temperature | Sampling site                      | # alive start exposure | # alive end | # dead end |
|-------------|------------------------------------|------------------------|-------------|------------|
| 18 °C       | 4-stage-WWTP <sub>upstream</sub>   | 50                     | 47          | 3          |
| 18 °C       | 4-stage-WWTP <sub>downstream</sub> | 52                     | 51          | 1          |
| 18 °C       | 3-stage-WWTP <sub>upstream</sub>   | 50                     | 48          | 2          |
| 18 °C       | 3-stage-WWTP <sub>downstream</sub> | 50                     | 50          | 0          |
| 25 °C       | 4-stage-WWTP <sub>upstream</sub>   | 50                     | 23          | 27         |
| 25 °C       | 4-stage-WWTP <sub>downstream</sub> | 50                     | 35          | 15         |
| 25 °C       | 3-stage-WWTP <sub>upstream</sub>   | 50                     | 19          | 31         |
| 25 °C       | 3-stage-WWTP <sub>downstream</sub> | 50                     | 23          | 27         |
